# Supplementary material
Source: Springer Nature journal article supplement (https://www.springermedizin.de/resource/supplementary/12913_2010_1368_MOESM1_ESM.pdf/9527984)
Supplement: MOESM1 [file 9527984]

Category G  
Organizational

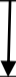

|            |               |
|------------|---------------|
| Category A | Financial     |
| Category B | Technical     |
| Category C | Time          |
| Category D | Psychological |
| Category E | Social        |
| Category F | Legal         |

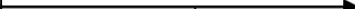

High EMR  
Adoption Rate

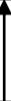

Category H  
Change Process
